# Supplementary material for: Cross-Amplification of Vicia sativa subsp. sativa Microsatellites across 22 Other Vicia Species
Source: Molecules. 2015 Jan 16;20(1):1543–50. doi: 10.3390/molecules20011543 (PMC6272350; doi:10.3390/molecules20011543)
Supplement: Supplementary file 1 [file molecules-20-01543-s001.xlsx]

## Sheet: Supp Table 1
Supplementary Table S1. Results of cross-amplification of 36 microsatellite markers on 23 Vicia species
Genebank No.	Species	origin	GBSSR-VSspS-20F		GBSSR-VSspS-23H		GBSSR-VSspS-73H		GBSSR-VSspS-76H		GBSSR-VSspS-80F		GBSSR-VSspS-79H		GBSSR-VSspS-90F		GBSSR-VSspS-99H		GBSSR-VSspS-107F		GBSSR-VSspS-102H		GBSSR-VSspS-125F		GBSSR-VSspS-119H		GBSSR-VSspS-140F		GBSSR-VSspS-126H		GBSSR-VSspS-166F		GBSSR-VSspS-179H		GBSSR-VSspS-181F		GBSSR-VSspS-203H		GBSSR-VSspS-247H		GBSSR-VSspS-301F		GBSSR-VSspS-310F		GBSSR-VSspS-313H		GBSSR-VSspS-67F		GBSSR-VSspS-251H
K170963	Vicia amoena	MNG	-	-	-	-	-	-	244	247	230	230	-	-	-	-	-	-	280	290	251	251	-	-	261	261	-	-	-	-	-	-	340	340	185	205	-	-	186	186	215	215	-	-	-	-	-	-	256
K170965	Vicia amoena	MNG	194	194	180	180	-	-	250	250	227	227	165	165	185	185	231	231	-	-	-	-	227	227	261	261	-	-	-	-	-	-	-	-	-	-	294	294	-	-	-	-	-	-	-	-	214	214	256
K175395	Vicia amoena	KOR	-	-	-	-	-	-	244	247	227	230	-	-	179	179	-	-	-	-	-	-	227	230	261	261	-	-	-	-	-	-	340	340	185	208	-	-	-	-	215	215	-	-	-	-	-	-	190
K175396	Vicia amoena	KOR	-	-	168	168	-	-	250	250	230	230	-	-	188	188	222	222	278	280	-	-	230	230	261	261	-	-	-	-	281	281	296	296	185	208	-	-	189	189	-	-	-	-	-	-	-	-	174
K170970	Vicia anatolica	ARM	-	-	-	-	-	-	250	250	224	224	-	-	185	185	-	-	284	284	242	242	224	224	261	261	-	-	-	-	-	-	-	-	197	197	-	-	189	189	-	-	-	-	-	-	-	-	322
K170971	Vicia anatolica	ARM	206	206	-	-	-	-	250	250	227	230	-	-	194	194	219	219	274	278	251	251	227	230	258	258	-	-	-	-	-	-	316	319	205	205	-	-	189	189	-	-	-	-	-	-	-	-	152
K170976	Vicia articulata	TUR	-	-	-	-	-	-	-	-	224	224	-	-	170	170	219	219	280	280	-	-	224	224	258	258	-	-	-	-	-	-	307	307	179	185	-	-	-	-	-	-	-	-	-	-	-	-	170
K170979	Vicia articulata	ECU	-	-	-	-	-	-	-	-	224	224	-	-	-	-	-	-	280	280	-	-	-	-	-	-	-	-	-	-	-	-	-	-	185	185	-	-	-	-	-	-	-	-	-	-	-	-	170
K170980	Vicia articulata	ECU	-	-	-	-	-	-	-	-	224	224	-	-	-	-	219	219	280	280	-	-	-	-	-	-	-	-	-	-	-	-	307	307	185	185	-	-	-	-	-	-	184	187	-	-	-	-	170
K170982	Vicia articulata	TUR	-	-	-	-	-	-	-	-	224	224	-	-	-	-	219	219	280	280	-	-	-	-	-	-	-	-	-	-	-	-	307	307	185	185	-	-	-	-	-	-	184	187	-	-	-	-	170
K170986	Vicia benghalensis	UnKnown	-	-	-	-	-	-	250	250	-	-	-	-	188	188	219	219	274	274	251	251	233	233	-	-	-	-	-	-	-	-	296	296	205	205	-	-	189	189	-	-	-	-	-	-	-	-	164
K170992	Vicia benghalensis	UnKnown	-	-	-	-	-	-	250	250	-	-	-	-	188	188	219	219	274	274	251	251	233	233	-	-	-	-	-	-	-	-	296	296	205	205	-	-	189	189	-	-	-	-	-	-	-	-	164
K170994	Vicia benghalensis	UnKnown	-	-	-	-	-	-	250	250	224	224	-	-	188	188	219	219	274	274	-	-	224	224	-	-	-	-	-	-	-	-	296	296	205	205	-	-	189	189	-	-	-	-	259	259	-	-	162
K170997	Vicia benghalensis	UnKnown	-	-	-	-	-	-	250	250	-	-	-	-	188	188	219	219	274	274	-	-	233	233	-	-	-	-	-	-	-	-	296	296	205	205	-	-	189	189	-	-	187	187	-	-	-	-	162
K171015	Vicia cassubica	BGR	-	-	-	-	-	-	247	247	227	230	-	-	-	-	-	-	-	-	251	251	227	227	258	258	-	-	-	-	-	-	220	340	185	208	-	-	-	-	-	-	181	181	-	-	-	-	174
K171016	Vicia cassubica	BGR	-	-	-	-	-	-	247	247	227	227	-	-	-	-	-	-	-	-	-	-	227	227	258	258	-	-	-	-	-	-	220	340	185	208	-	-	-	-	-	-	181	181	-	-	-	-	-
K171017	Vicia costata	CHN	-	-	-	-	-	-	247	247	224	230	-	-	182	182	-	-	-	-	-	-	224	230	261	261	-	-	-	-	-	-	340	340	185	208	-	-	-	-	-	-	-	-	-	-	-	-	256
K171018	Vicia costata	CHN	-	-	-	-	-	-	-	-	-	-	-	-	182	182	-	-	-	-	-	-	-	-	261	261	-	-	-	-	-	-	340	340	185	208	-	-	-	-	215	215	-	-	-	-	-	-	190
K171019	Vicia cracca	TUR	206	206	-	-	-	-	250	250	227	227	-	-	188	188	219	219	274	278	251	251	227	227	258	258	-	-	-	-	281	281	296	296	202	202	-	-	189	189	-	-	-	-	-	-	-	-	248
K171020	Vicia cracca	TUR	197	197	-	-	-	-	250	250	227	227	-	-	188	188	219	219	-	-	-	-	227	227	258	258	-	-	-	-	281	281	-	-	-	-	-	-	-	-	-	-	-	-	-	-	-	-	154
K171021	Vicia cracca	MNG	206	206	-	-	-	-	250	250	-	-	-	-	-	-	219	222	274	274	251	251	227	230	258	258	-	-	-	-	281	281	316	319	205	205	-	-	189	189	-	-	-	-	-	-	-	-	-
K171022	Vicia cracca	MNG	206	206	-	-	-	-	250	250	224	230	-	-	194	194	216	219	-	-	-	-	224	230	258	258	-	-	-	-	281	281	316	319	202	202	-	-	189	189	-	-	-	-	-	-	-	-	256
K171023	Vicia disperma	URY	-	-	-	-	-	-	250	250	230	230	-	-	188	188	207	207	-	-	-	-	230	230	-	-	254	254	-	-	-	-	293	293	197	197	-	-	189	189	-	-	-	-	-	-	-	-	-
K171024	Vicia disperma	BGR	-	-	-	-	-	-	-	-	224	224	148	148	-	-	-	-	-	-	-	-	221	221	201	261	-	-	-	-	-	-	307	307	185	185	-	-	-	-	-	-	184	187	-	-	-	-	-
K171072	Vicia ervilia	TUR	-	-	-	-	-	-	-	-	233	233	-	-	-	-	219	219	294	294	-	-	227	227	261	261	-	-	-	-	-	-	-	-	185	185	-	-	-	-	-	-	-	-	-	-	-	-	236
K171073	Vicia ervilia	TUR	-	-	-	-	-	-	-	-	227	227	-	-	-	-	219	219	300	300	-	-	227	227	261	261	-	-	-	-	-	-	310	310	185	185	-	-	-	-	-	-	184	187	-	-	-	-	-
K171074	Vicia ervilia	TUR	-	-	-	-	-	-	-	-	227	227	-	-	-	-	219	219	-	-	-	-	227	227	261	261	-	-	-	-	-	-	310	310	185	197	-	-	-	-	-	-	184	187	-	-	-	-	256
K171077	Vicia ervilia	TUR	-	-	-	-	-	-	-	-	227	227	-	-	-	-	219	219	-	-	-	-	227	227	261	261	-	-	-	-	-	-	310	310	185	185	-	-	-	-	-	-	193	193	-	-	-	-	256
K175403	Vicia hirsuta	KOR	-	-	-	-	-	-	-	-	224	224	148	148	173	173	-	-	278	278	-	-	221	221	201	258	-	-	-	-	-	-	307	307	179	185	-	-	-	-	-	-	184	187	-	-	-	-	256
K175407	Vicia hirsuta	KOR	194	194	-	-	-	-	250	250	227	227	165	165	182	182	234	234	-	-	254	254	227	227	261	261	251	251	238	238	-	-	-	-	-	-	294	297	-	-	-	-	-	-	-	-	214	214	154
K195313	Vicia hyrcanica	UZB	-	-	-	-	209	209	250	250	224	224	-	-	-	-	-	-	274	274	251	251	224	224	258	273	-	-	-	-	-	-	-	-	185	185	-	-	-	-	-	-	187	187	-	-	-	-	256
K195314	Vicia hyrcanica	TJK	194	194	183	183	-	-	247	250	224	227	165	165	185	185	231	231	274	278	251	254	224	227	261	273	254	254	247	247	283	283	319	327	179	185	294	294	189	189	218	218	187	187	259	259	214	214	256
K195315	Vicia hyrcanica	UZB	-	-	-	-	-	-	247	247	224	224	-	-	173	173	219	219	266	274	251	251	224	224	258	273	-	-	-	-	-	-	-	-	-	-	-	-	-	-	-	-	-	-	-	-	-	-	-
K195316	Vicia hyrcanica	TJK	-	-	-	-	-	-	247	247	224	224	-	-	173	173	219	219	274	274	251	251	224	224	258	273	-	-	-	-	-	-	327	327	185	185	-	-	-	-	-	-	-	-	-	-	-	-	-
K195317	Vicia lutea	TUR	194	194	183	183	197	206	247	250	224	227	165	165	185	185	219	231	274	278	254	254	224	227	261	264	-	-	-	-	-	-	319	340	179	179	294	294	-	-	-	-	175	187	259	259	214	214	256
K195318	Vicia lutea	SYR	-	-	168	168	206	206	247	247	233	233	188	188	197	197	219	219	278	280	254	254	-	-	261	261	-	-	-	-	-	-	340	340	185	208	-	-	-	-	-	-	190	190	-	-	-	-	256
K195319	Vicia michauxii	TUR	-	-	-	-	203	203	-	-	-	-	-	-	-	-	222	222	278	278	254	254	233	233	-	-	-	-	-	-	-	-	340	340	185	185	-	-	-	-	-	-	178	178	-	-	223	223	256
K195320	Vicia michauxii	TUR	-	-	-	-	203	203	247	247	-	-	188	188	197	197	216	216	278	278	254	254	230	230	261	261	-	-	-	-	-	-	340	340	194	197	-	-	-	-	-	-	184	187	259	259	-	-	256
K195321	Vicia michauxii	TUR	194	194	177	180	-	-	247	250	227	230	165	188	185	185	219	231	278	278	254	263	227	230	261	261	-	-	241	241	-	-	340	340	185	185	-	-	189	189	-	-	184	187	259	259	214	214	256
K195322	Vicia michauxii	TUR	-	-	-	-	203	203	247	247	-	-	188	188	197	197	222	222	278	278	254	254	230	230	258	258	-	-	-	-	-	-	340	340	185	185	-	-	-	-	212	212	178	178	-	-	-	-	256
K195324	Vicia montbretii	TUR	194	194	177	177	-	-	250	250	227	227	165	165	185	185	219	231	274	284	251	254	227	233	258	261	248	248	247	247	283	283	322	343	185	185	297	297	-	-	221	221	187	187	267	267	214	214	254
K195325	Vicia montbretii	TUR	-	-	-	-	-	-	250	250	233	233	-	-	176	176	219	219	274	274	251	251	233	233	258	258	-	-	-	-	-	-	343	343	185	197	-	-	-	-	-	-	184	187	-	-	-	-	-
K195326	Vicia montbretii	TUR	-	-	177	177	209	209	250	250	233	233	-	-	176	176	219	219	274	274	251	251	233	233	258	258	-	-	-	-	-	-	343	343	185	185	-	-	-	-	-	-	-	-	-	-	-	-	-
K195327	Vicia montbretii	TUR	-	-	177	177	209	209	250	250	233	233	-	-	176	176	219	219	274	274	251	251	233	233	258	258	-	-	-	-	-	-	343	343	185	185	-	-	186	186	-	-	-	-	-	-	-	-	-
K195328	Vicia narbonensis	ISR	-	-	-	-	203	203	253	253	-	-	-	-	182	182	219	219	278	278	254	254	227	227	258	258	-	-	-	-	-	-	340	340	185	185	-	-	189	189	-	-	184	187	-	-	-	-	234
K195329	Vicia narbonensis	ISR	-	-	-	-	-	-	253	253	-	-	-	-	182	182	219	219	278	278	254	254	-	-	258	258	-	-	-	-	-	-	340	340	185	185	-	-	189	189	-	-	-	-	259	259	-	-	230
K195330	Vicia narbonensis	SYR	-	-	-	-	-	-	-	-	-	-	-	-	-	-	-	-	278	278	254	254	233	233	258	258	-	-	-	-	-	-	340	340	185	202	-	-	189	189	-	-	-	-	-	-	-	-	230
K195331	Vicia narbonensis	TUR	-	-	-	-	-	-	253	253	-	-	-	-	182	185	216	216	280	288	254	254	233	233	255	258	-	-	-	-	-	-	340	340	185	202	-	-	189	189	-	-	187	187	-	-	-	-	230
K195333	Vicia pannonica	CSK	-	-	-	-	-	-	247	247	224	224	191	191	173	173	219	219	274	274	-	-	224	224	264	264	-	-	-	-	-	-	-	-	-	-	-	-	-	-	-	-	-	-	-	-	-	-	198
K195334	Vicia pannonica	TUR	-	-	-	-	-	-	247	247	224	224	-	-	173	176	219	222	-	-	-	-	227	227	261	261	-	-	-	-	-	-	343	343	185	185	-	-	-	-	-	-	181	181	-	-	-	-	-
K195335	Vicia peregrina	IRN	-	-	-	-	206	209	247	247	236	236	188	188	197	197	219	219	278	280	254	254	236	236	261	261	-	-	-	-	-	-	340	340	185	185	-	-	-	-	-	-	187	190	-	-	-	-	-
K195336	Vicia peregrina	UZB	-	-	-	-	206	206	247	247	236	236	-	-	197	197	219	219	278	280	254	254	236	236	261	261	-	-	-	-	-	-	340	340	185	185	-	-	-	-	-	-	190	190	-	-	-	-	244
K195337	Vicia peregrina	TUR	-	-	-	-	206	206	247	247	233	233	188	188	197	197	219	219	278	278	254	254	233	233	261	261	-	-	-	-	-	-	340	340	185	185	-	-	-	-	-	-	184	187	-	-	-	-	-
K195338	Vicia peregrina	ESP	-	-	-	-	206	206	247	247	233	233	188	188	-	-	219	219	278	278	254	254	-	-	-	-	-	-	-	-	-	-	340	340	185	185	-	-	-	-	-	-	181	187	-	-	-	-	244
K193673	Vicia sativa subsp. nigra	TUR	194	194	177	177	203	203	250	250	227	227	168	168	188	188	216	216	284	284	254	254	227	227	261	261	248	248	241	241	283	283	322	322	185	185	288	288	-	-	-	-	175	175	259	259	214	214	256
K193674	Vicia sativa subsp. nigra	TUR	194	194	-	-	200	203	250	250	227	227	165	165	185	185	231	231	278	284	254	263	227	227	261	261	254	254	241	241	283	283	322	322	185	185	-	-	-	-	-	-	184	184	259	259	214	214	256
K193675	Vicia sativa subsp. nigra	IRN	194	194	180	180	200	200	250	250	227	227	165	165	185	185	231	231	278	278	263	263	227	227	261	261	251	251	238	238	283	283	316	316	182	182	-	-	-	-	-	-	187	187	259	259	214	214	154
K193676	Vicia sativa subsp. nigra	IRN	194	194	177	177	203	203	250	250	227	227	165	165	185	185	231	231	278	278	254	254	227	227	261	261	254	254	241	241	283	283	-	-	185	185	-	-	-	-	-	-	187	187	259	259	214	214	256
K193680	Vicia sativa subsp. nigra	ISR	-	-	-	-	-	-	250	250	227	227	165	165	185	185	231	231	278	278	263	263	227	227	261	261	-	-	-	-	-	-	316	316	182	185	-	-	-	-	-	-	187	187	259	259	214	214	256
K193681	Vicia sativa subsp. nigra	ISR	-	-	-	-	206	206	250	250	227	227	165	165	185	185	231	231	278	278	263	263	227	227	-	-	-	-	-	-	-	-	-	-	182	185	-	-	-	-	-	-	187	187	259	259	214	214	256
K193697	Vicia sativa subsp. nigra	UZB	-	-	180	180	-	-	253	253	227	227	165	165	182	182	231	231	278	278	263	263	227	227	261	261	-	-	238	238	283	283	316	316	182	185	297	297	-	-	-	-	187	187	259	259	214	214	154
K193698	Vicia sativa subsp. nigra	UZB	-	-	180	180	-	-	250	253	227	227	165	165	182	185	231	231	278	278	263	263	227	227	258	258	251	251	238	238	-	-	-	-	-	-	297	297	-	-	-	-	-	-	-	-	214	214	154
K193702	Vicia sativa subsp. sativa	BGR	194	194	177	177	206	206	250	250	227	227	165	165	182	182	231	231	278	278	254	254	227	227	261	261	254	254	247	247	283	283	322	322	185	185	294	294	-	-	-	-	184	184	259	259	214	214	256
K193703	Vicia sativa subsp. sativa	GRC	194	194	177	177	197	206	250	250	227	227	165	168	-	-	231	231	278	284	254	263	227	227	261	261	248	248	241	241	283	283	319	322	185	185	294	294	-	-	-	-	184	187	259	259	214	214	256
K193704	Vicia sativa subsp. sativa	GRC	194	194	177	177	206	206	250	250	227	227	165	165	185	185	231	231	278	278	254	254	227	227	261	261	-	-	247	247	283	283	322	322	185	185	297	297	-	-	218	218	184	184	259	259	214	214	256
K193706	Vicia sativa subsp. sativa	TUR	194	194	177	177	197	206	250	250	227	227	165	165	-	-	231	231	284	284	254	263	227	227	261	261	-	-	247	247	283	283	319	319	185	185	294	297	-	-	218	218	184	184	259	259	214	214	256
K193709	Vicia sativa subsp. sativa	CZE	194	194	180	180	203	203	250	250	224	224	165	165	182	182	216	216	278	278	254	254	227	227	261	261	248	248	241	241	283	283	322	322	179	185	-	-	189	189	218	218	187	187	259	259	214	214	256
K193710	Vicia sativa subsp. sativa	CZE	194	194	180	180	203	203	250	250	227	227	165	165	182	182	231	231	278	278	254	254	227	227	261	261	248	248	241	241	283	283	322	322	179	185	294	294	189	189	218	218	187	187	259	259	214	214	256
K193717	Vicia sativa subsp. sativa	DEU	194	194	177	183	197	206	250	250	227	227	165	165	185	185	231	231	278	278	254	254	227	227	261	261	254	254	247	247	-	-	316	319	185	205	294	294	196	196	218	218	184	184	259	259	214	214	256
K193718	Vicia sativa subsp. sativa	FRA	194	194	177	177	-	-	250	250	227	227	168	168	182	182	231	231	278	278	254	254	227	227	261	261	248	248	241	241	-	-	-	-	-	-	294	294	-	-	-	-	-	-	-	-	214	214	256
K193720	Vicia sativa subsp. sativa	FRA	194	194	180	180	206	206	250	250	227	227	165	165	185	185	231	231	278	278	254	254	227	227	261	261	254	254	247	247	283	283	322	322	185	185	297	297	196	196	-	-	187	187	259	259	214	214	256
K193722	Vicia sativa subsp. sativa	BGR	194	194	177	177	206	206	250	250	227	227	171	171	185	185	231	231	278	278	254	254	227	227	261	261	254	254	241	241	283	283	319	319	185	185	294	294	189	189	218	218	187	187	259	259	214	214	256
K193730	Vicia sativa subsp. sativa	DEU	194	194	177	177	206	206	250	250	227	227	165	165	182	182	231	231	278	278	254	254	227	227	261	261	248	248	247	247	283	283	322	322	185	185	294	294	189	189	218	218	187	187	259	259	214	214	256
K193734	Vicia sativa subsp. sativa	TUR	194	194	180	180	206	206	250	250	227	227	165	165	185	185	234	234	278	278	254	254	227	227	261	261	254	254	241	241	283	283	322	322	185	185	294	294	-	-	218	218	187	187	259	259	214	214	256
K193735	Vicia sativa subsp. sativa	TUR	-	-	-	-	-	-	250	250	227	227	165	165	185	185	231	234	278	278	254	254	227	227	261	261	254	254	241	241	283	283	319	322	179	185	294	294	189	189	218	218	184	187	259	259	214	214	256
K195763	Vicia sativa subsp. sativa	TUR	194	194	180	180	-	-	-	-	233	233	165	165	185	185	-	-	278	278	254	254	227	227	261	261	254	254	241	241	283	283	322	322	185	185	288	288	189	189	218	218	187	187	259	259	214	214	256
K175402	Vicia tetrasperma	KOR	-	-	-	-	206	206	250	250	227	227	-	-	-	-	216	216	280	280	-	-	-	-	261	261	-	-	-	-	-	-	337	337	185	185	-	-	186	186	-	-	175	175	-	-	211	241	198
K175404	Vicia tetrasperma	KOR	-	-	-	-	-	-	-	-	224	224	148	148	173	173	-	-	278	278	-	-	221	221	201	258	-	-	-	-	-	-	307	307	185	185	-	-	-	-	-	-	184	187	-	-	-	-	256
K175405	Vicia tetrasperma	KOR	-	-	-	-	-	-	-	-	224	224	148	148	173	173	-	-	278	278	-	-	221	221	201	258	-	-	-	-	-	-	307	307	185	185	-	-	-	-	-	-	-	-	-	-	-	-	-
K175406	Vicia tetrasperma	KOR	194	194	-	-	206	206	250	250	227	227	165	165	182	182	234	234	-	-	245	245	227	227	261	261	251	251	238	238	283	283	316	316	182	182	294	294	189	189	218	218	187	187	259	259	214	214	154
K195344	Vicia unijuga	MNG	-	-	-	-	-	-	244	247	230	230	-	-	179	182	219	219	284	284	242	242	230	230	261	261	-	-	-	-	-	-	340	340	208	211	-	-	-	-	-	-	184	187	-	-	-	-	-
K195345	Vicia unijuga	MNG	-	-	180	183	206	206	247	247	230	230	-	-	179	179	-	-	294	294	242	242	230	230	261	261	-	-	-	-	-	-	340	343	208	208	-	-	-	-	215	215	-	-	-	-	-	-	-
K195346	Vicia villosa	TUR	-	-	168	168	-	-	250	250	224	224	-	-	-	-	219	222	272	274	251	251	236	236	261	261	-	-	-	-	-	-	296	296	205	208	-	-	-	-	-	-	-	-	-	-	-	-	230
K195347	Vicia villosa	TUR	194	194	177	177	-	-	250	250	227	227	165	165	185	185	231	231	278	278	254	254	227	227	261	261	251	251	241	241	283	283	319	319	185	185	297	297	196	196	-	-	187	187	259	259	214	214	256
K195354	Vicia villosa	IRN	-	-	168	168	-	-	250	250	-	-	-	-	-	-	219	219	274	274	251	251	236	236	255	261	-	-	-	-	281	281	296	296	205	205	-	-	189	189	-	-	187	187	-	-	-	-	174
K195361	Vicia villosa	IRN	-	-	168	168	-	-	247	250	224	224	-	-	-	-	219	219	274	274	251	251	233	236	255	258	-	-	-	-	-	-	296	296	185	205	-	-	189	189	-	-	187	187	-	-	-	-	230
K195380	Vicia villosa subsp. varia	GRC	-	-	168	168	-	-	250	250	230	230	-	-	188	188	219	222	278	284	251	251	230	230	261	261	-	-	-	-	281	281	296	296	205	208	-	-	189	189	-	-	181	187	-	-	-	-	154
K195381	Vicia villosa subsp. varia	GRC	-	-	-	-	-	-	250	250	233	233	-	-	188	188	222	222	280	288	251	251	233	233	261	261	-	-	-	-	281	281	296	296	205	208	-	-	189	189	-	-	181	184	-	-	-	-	174
[truncated: 25 more columns]

## Sheet: Supp. table 2.
	Supplementary Table S2. Summary of cross-amplification of 36 microsatellite markers on 23 Vicia species
	Species (sample size)	V. amoena	V. anatolica	V. articulata	V. benghalensis	V. cassubica	V. costata	V. cracca	V. disperma	V. ervilia	V. hirsuta	V. hyrcanica	V. lutea	V. michauxii	V. montbretii	V. narbonensis	V. pannonica	V. peregrina	V. sativasubsp.nigra	V. sativasubsp.sativa	V. tetrasperma	V. unijuga	V. villosa	V. villosa subsp.varia
	GBSSR-VSspS-020	194	206	-	-	-	-	197, 206	-	-	194	194	194	194	194	-	-	-	194, 197	194	194	-	194	-
	GBSSR-VSspS-023	168, 180	-	-	-	-	-	-	-	-	-	183	168, 183	177	177	-	-	-	177, 180	177, 180	-	180	168, 177	168
	GBSSR-VSspS-073	-	-	-	-	-	-	-	-	-	-	209	197, 206	203	209	203	-	206	200, 203, 206	197, 200, 203, 206	206	206	-	-
	GBSSR-VSspS-076	244, 247, 250	250	-	250	247	247	250	250	-	250	247	250	247, 250	250	253	247	247	250, 253	250	250	244, 247	247, 250	250
	GBSSR-VSspS-080	227, 230	224, 227, 230	224	224	227, 230	224, 230	224, 227, 230	224, 230	227, 233	224, 227	224, 227	224, 227, 233	227, 230	227, 233	-	224	233, 236	227	224, 227, 233	224, 227	230	224, 227	230, 233
	GBSSR-VSspS-079	165	-	-	-	-	-	-	148	-	148	165	165, 188	165, 188	165	-	191	188	165, 168	165, 168, 171	148, 165	-	165	-
	GBSSR-VSspS-090	179, 185, 188	185, 194	170	188	-	182	188, 194	188	-	173, 182	173, 185	185, 197	185, 197	176, 185	182, 185	173, 176	197	182, 185, 188	182, 185, 188	173, 182	179, 182	185	188
	GBSSR-VSspS-099	222, 231	219	219	219	-	-	216, 219, 222	207	219	234	219, 231	219, 231	216, 219, 222, 231	219, 231	216, 219	219, 222	219	216, 231	216, 231, 234	216, 234	219	219, 222, 231	219, 222
	GBSSR-VSspS-107	278, 280, 290	274, 278, 284,	280	274	-	-	274, 278	-	294, 300	278	266, 274, 278	274, 278, 280	278	274, 284	278, 280, 288	274	278, 280	278, 284	278, 284	278, 280	284, 294	272, 274, 278	278, 280, 284, 288
	GBSSR-VSspS-102	251	242, 251	-	251	251	-	251	-	-	254	251, 254	254	254, 263	251, 254	254	-	254	254, 263	294, 263	245	242	251, 254	251
	GBSSR-VSspS-125	227, 230	224, 227, 230	224	224, 233	227	224, 230	224, 227, 230	221, 230	227	221, 227	224, 227	224, 227	227, 230, 233	227, 233	227, 233	224, 227	233, 236	227	227	221, 227	230	227, 233, 236	230, 233
	GBSSR-VSspS-119	261	258, 261	258	-	258	261	258	201, 261	261	201, 258, 261	258, 261, 273	261, 264	258, 261	258, 261	255, 258	261, 264	261	258, 261	261	201, 258, 261	261	255, 258, 261	261
	GBSSR-VSspS-140	-	-	-	-	-	-	-	254	-	251	254	-	-	248	-	-	-	248, 251, 254	248, 251, 254	251	-	251	-
	GBSSR-VSspS-126	-	-	-	-	-	-	-	-	-	238	247	-	241	247	-	-	-	238, 241	241, 247	238	-	241	-
	GBSSR-VSspS-166	281	-	-	-	-	-	281	-	-	-	283	-	-	283	-	-	-	283	283, 285	283	-	281, 283	281
	GBSSR-VSspS-179	296, 340	316, 319	307	296	220, 340	340	296, 316, 319	293, 307	310	307	319, 327	319, 340	340	322, 343	340	343	340	316, 322	316, 319, 322	307, 316, 337	340, 343	296, 319	296
	GBSSR-VSspS-181	185, 205, 208	197, 205	179, 185	205	185, 208	185, 208	202, 205	185, 197	185, 197	179, 185	179, 185	179, 185, 208	185, 194, 197	185, 197	185, 202	185	185	182, 185	179, 185, 205	182, 185	208, 211	185, 205, 208	205, 208
	GBSSR-VSspS-203	294	-	-	-	-	-	-	-	-	294, 297	294	294	-	297	-	-	-	288, 291, 297	288, 294, 297	294	-	297	-
	GBSSR-VSspS-247	186, 189	189	-	189	-	-	189	-	-	-	189	-	189	186	189	-	-	189	189, 196	186, 189	-	189, 196	189
	GBSSR-VSspS-301	215	-	-	-	-	215	-	-	-	-	218	-	212	221	-	-	-	218	218	218	215	-	-
	GBSSR-VSspS-310	-	-	184, 187	187	181	-	-	184, 187	184, 187, 193	184, 187	187	175, 187, 190	178, 184, 187	184, 187	184, 187	181	181, 184, 187, 190	175, 184, 187	184, 187	175, 184, 187	184, 187	187	181, 184, 187
	GBSSR-VSspS-313	-	-	-	259	-	-	-	-	-	-	259	259	259	267	259	-	-	259	259	259	-	259	-
	GBSSR-VSspS-067	214	-	-	-	-	-	-	-	-	214	214	214	214, 223	214	-	-	-	214	214	211, 214, 241	-	214	-
	GBSSR-VSspS-251	174, 190, 256, 272, 300	152, 322	625, 256	162, 164, 256	174	190, 256	154, 248, 256	-	236, 256	154, 256	256, 272	256, 272	256, 270, 272	254	230, 234	198	244, 256	154, 254, 256, 272	256, 272	154, 198, 256	-	174, 230, 256, 264, 272, 322	154, 174, 256
	GBSSR-VSspS-37	274, 292, 298, 301	328	298	286, 298	289, 292	292, 295	289, 298, 328	-	244, 325	301	286, 298, 307	295, 298, 307	295, 307	301	298	295, 298	295	301	298, 301, 307	301	292	301	-
	GBSSR-VSspS-268	177, 183	177	180	177	186	-	177	177	-	177, 183	177, 180, 183	17, 183	177, 180	177, 183	177	177	177	180, 183, 186	180, 183	177, 183	-	177, 180	177, 180, 183
	GBSSR-VSspS-042	168, 171, 174	168, 171	201	171	168	168	171, 186	174, 201	201	174, 201	165, 174	168, 174	174	165, 174	174	168, 174	174	174	174	165, 174, 201	156, 165, 168	168, 171, 174	168, 171
	GBSSR-VSspS-305	218, 221, 227	221, 233	230	221	211	211	211, 233	197, 221, 230	227	230	221, 230	221, 230	230	221, 230	177, 230, 233, 266	215, 221, 224	230	227, 230	227, 230	218, 230	221	221, 230	221
	GBSSR-VSspS-088	245	-	242, 245	242	-	-	-	242	-	242	242, 245	245	245	242, 245	-	-	-	242, 245	245	242	-	242, 245	-
	GBSSR-VSspS-308	244, 262	-	262	252	-	262	-	230, 242	262	-	262	262, 271	262	262	-	-	262	262	262	-	-	262	-
	GBSSR-VSspS-024	251	-	-	-	-	-	-	-	-	251	251	251	251	257	-	-	-	242, 251	251	251	-	251	-
	GBSSR-VSspS-028	311	-	-	-	-	-	-	-	-	311	311	311	311	311	-	-	308, 311	308, 311	308, 311	311	-	308	-
	GBSSR-VSspS-075	240, 255	240, 243	-	240	-	-	240	240	-	255	255	249	255, 258	243, 255	-	-	191, 249	255, 258	255, 258	258	-	240, 255	240
	GBSSR-VSspS-091	188	188	188	188	188	188	188	188	188	188	188	188	188	188	188	188	188	188	188	188	188	188	188
	GBSSR-VSspS-115	289, 301	299	275	285	303, 307	301, 305, 307	291, 293	299	-	301	301, 305	149, 264	297, 301	281, 303	289	283, 303	149, 264	289, 299, 214	297, 301	295, 301	301, 303, 311	301	283, 299, 301
	GBSSR-VSspS-129	213, 215, 219, 227	215	-	215	-	-	215	213, 215	-	213, 257	213, 223	213, 217, 223	221, 227	215, 231	-	213	-	211, 221, 223, 225, 227, 229, 267, 279	209, 211, 213, 215, 221, 223, 227	213, 277	213	217, 221	215
